# Supplementary material for: A comparison of acyl-moieties for noncovalent functionalization of PLGA and PEG-PLGA nanoparticles with a cell-penetrating peptide
Source: Royal Society of Chemistry journal article supplement (doi:10.1039/d1ra05871a), 2021-01-01
Supplement: d1ra05871a1.pdf [file d1ra05871a1.pdf]

1 **Supplementary Material**

2

3 **A comparison of acyl-moieties for noncovalent functionalization of**  
4 **PLGA and PEG-PLGA nanoparticles with a cell-penetrating peptide**

5 Omar Paulino da Silva Filho<sup>1,2</sup>, Muhanad Ali<sup>3</sup>, Rike Nabbefeld<sup>1</sup>, Daniel Primavessy<sup>4,5</sup>,  
6 Petra H. Bovee-Geurts<sup>1</sup>, Silko Grimm<sup>6</sup>, Andreas Kirchner<sup>4</sup>, Karl-Heinz Wiesmüller<sup>7</sup>,  
7 Marc Schneider<sup>4</sup>, X. Frank Walboomers<sup>3</sup>, Roland Brock<sup>1,8</sup>

8 *<sup>1</sup>Department of Biochemistry, Radboud Institute for Molecular Life Sciences, Radboud*  
9 *university medical center, Geert Grooteplein 28, 6525 GA Nijmegen, The Netherlands*

10 *<sup>2</sup>CAPES Foundation, Ministry of Education of Brazil, Brasília, 70.040-03, DF, Brazil*

11 *<sup>3</sup>Department of Odontology and Biomaterials, Radboud university medical center, Nijmegen,*  
12 *The Netherlands*

13 *<sup>4</sup>Department of Biopharmacy and Pharmaceutic Technology, Saarland University, 66123*  
14 *Saarbrücken, Germany*

15 *<sup>5</sup>Department of Pharmaceutics and Biopharmacy, Philipps-University Marburg, 35032*  
16 *Marburg, Germany*

17 *<sup>6</sup>Evonik Industries, Health Care, Formulation and Polymers, Kirschenallee, 64293 Darmstadt,*  
18 *Germany*

19 *<sup>7</sup>EMC microcollections GmbH, Sindelfinger Str. 3, 72070 Tübingen, Germany*

20 *<sup>8</sup>Department of Medical Biochemistry, College of Medicine and Medical Sciences, Arabian Gulf*  
21 *University, Kingdom of Bahrain.*

22 **Running head:** C16-hLF enhances PLGA and PEG-PLGA nanoparticle uptake.

23 **\*Corresponding authors:** Roland Brock, Department of Biochemistry, Radboud university  
24 medical center, Geert Grooteplein 28, 6525 GA, Nijmegen, the Netherlands.

25 E-mail: [roland.brock@radboudumc.nl](mailto:roland.brock@radboudumc.nl).

## 26 **Supplemental Materials & Methods**

27

### 28 *Quantification of pH, zeta potential and hLF adsorbed onto the nanoparticle surface*

29 FA-PLGA nanoparticles were prepared as described in section 2.2.1. Samples were  
30 resuspended at 5 mg/mL in 1 mL of Milli-Q water and 50 mM Hepes (Sigma Aldrich,  
31 Taufkirchen, Germany) at pH 8. Next, 450  $\mu$ L of each sample was diluted to 2.5 mg/mL  
32 with corresponded solution (Milli-Q water and Hepes) and incubated with 50  $\mu$ L of 1,  
33 0.1, and 0.01 mg/mL acetyl-hLF. Incubation with peptides was done overnight at RT.  
34 To remove the unbound peptides after the coating, the particles were centrifuged at  
35 16,000 *g* and redispersed in the same buffer in which they were before.

36 Measurements were conducted on days 0, 1, 2, 3, 4 and 7. For a measurement 100  
37  $\mu$ L were taken from the particle suspension and diluted 1:10 in Milli-Q water. From this  
38 resulting diluted particle suspension pH and zeta potential (measured with a Malvern  
39 Zetasizer ZS, Malvern Instruments, Worcestershire, United Kingdom) were measured.  
40 To determine particle-bound and free peptide, 200  $\mu$ L of the suspension were  
41 centrifuged (24,000 *g*, 20-25 min) and kept for a BCA assay. The pellet was washed  
42 again with MQ water and then redispersed in 200  $\mu$ L MQ water. The BCA assay was  
43 conducted with a QuantiPro BCA Assay Kit (Sigma Aldrich, Taufkirchen, Germany).  
44 The BCA solution was mixed according to the manual, then samples (either 150  $\mu$ L  
45 particle suspension, or 150  $\mu$ L supernatant) were mixed with 150  $\mu$ L BCA solution in a  
46 96-well plate and incubated for 2 hours at 37 ° C. After incubation, sample intensities  
47 were measured with a TECAN Reader Infinite 200 PRO (Tecan Group, Männedorf,  
48 Switzerland) at a wavelength of 562 nm. Furthermore, intensities for pure Hepes and

49 uncoated nanoparticle solution were determined and subtracted from the respective  
50 sample to correct for background.

51

52 **Supplemental Figures**

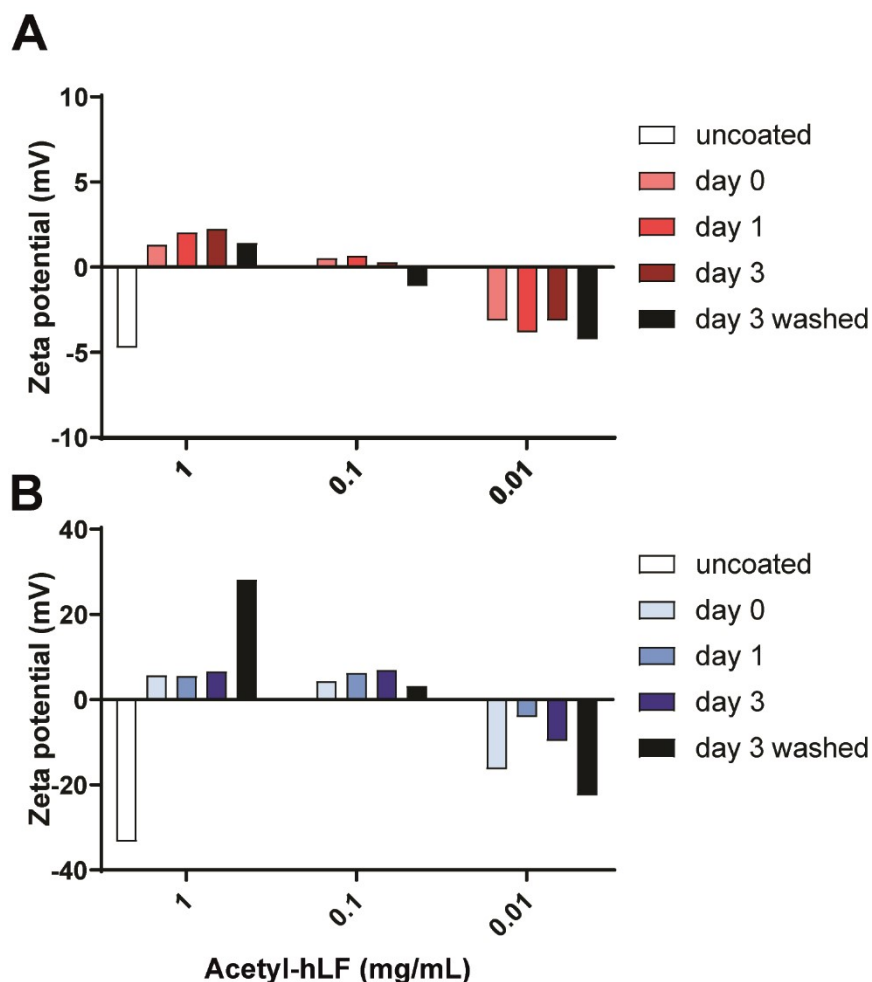

53

54

55 **Supplemental Figure 1. Time- and concentration dependence of zeta potentials.**

56 PLGA (Resomer RG 503 H) nanoparticles were prepared in water but resuspended in

57 (A) water or (B) HEPES. Suspensions of particles were incubated with the indicated

58 concentrations of acetyl peptide (acetyl-hLF) for 1h at RT and zeta potentials of the

59 particles were measured on the indicated days. To remove loosely bound peptide, on

60 day 3, parts of the particle suspension were washed and the zeta potentials were

61 measured again. There is no explanation for the strong increase of zeta potential for

62 particles at 1 mg/mL peptide after washing. This experiment was only performed once.

63



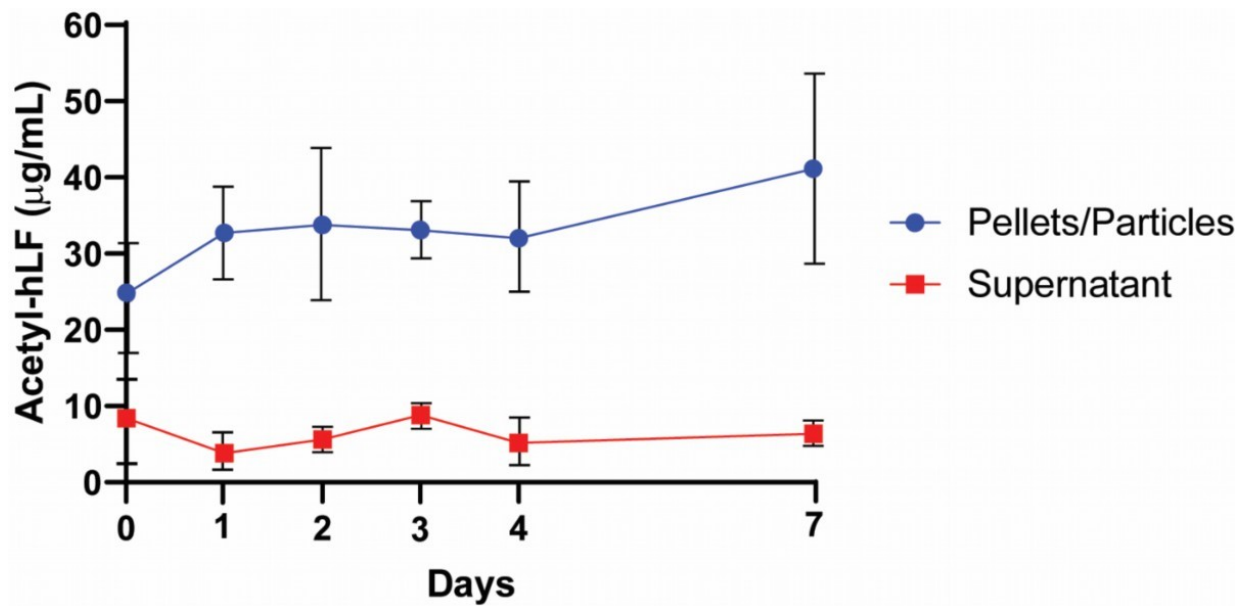

65

66 **Supplemental Figure 2. Amounts of acetyl-hLF peptide adsorbed to the surface of**  
 67 **PLGA particles and released into the supernatant.** The amount of peptide in the  
 68 supernatant and on the particles was determined by a BCA assay. Values of day 0  
 69 were taken right after the coating process. N=3, error bars describe standard  
 70 deviations.

71

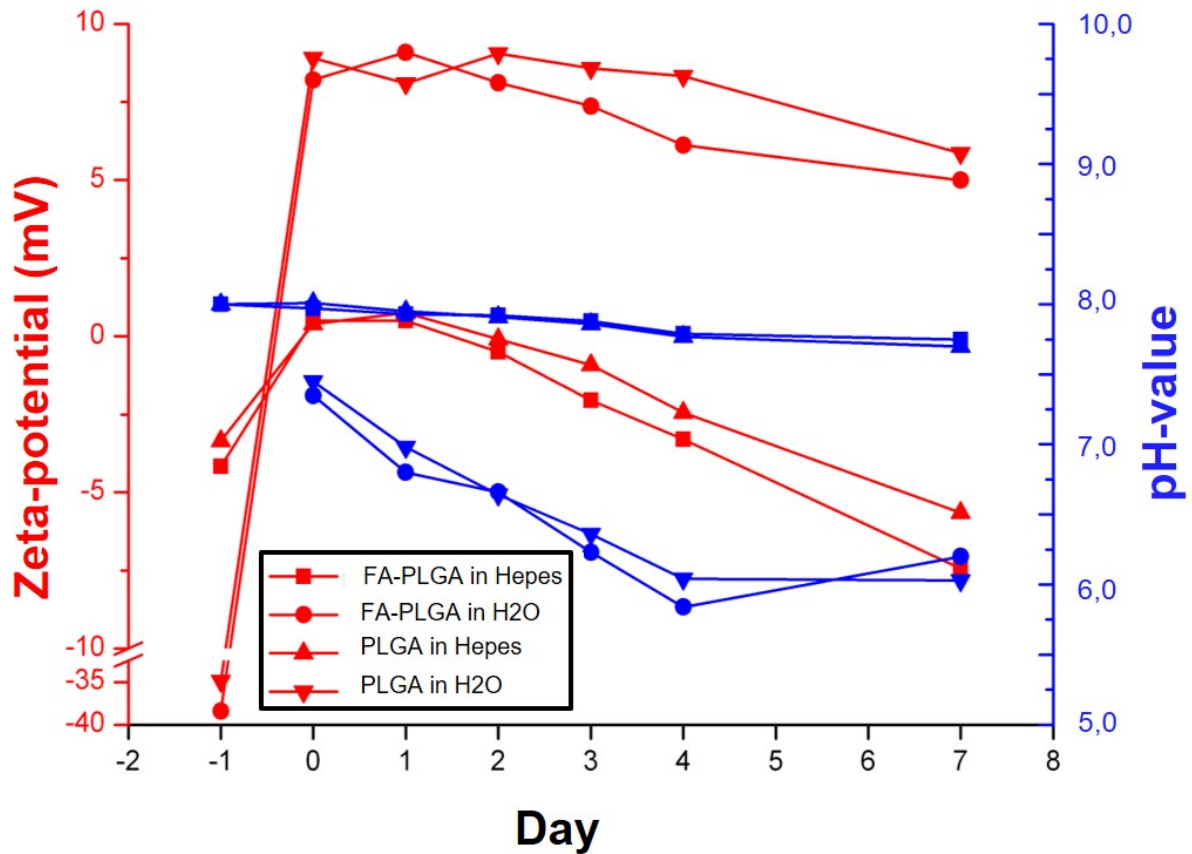

72

73

74 **Supplemental Figure 3. Zeta potentials and pH values of acetyl-hLF-coated PLGA**  
 75 **particles over time.** Measurements were performed in comparison over 8 days in 1:10  
 76 diluted in different solutions. Day -1 shows the values prior to nanoparticle coating, day  
 77 0 the values directly after coating. Storing the particles in buffered solution ensured a  
 78 stable pH and thereby prevented acidification through degradation of PLGA.

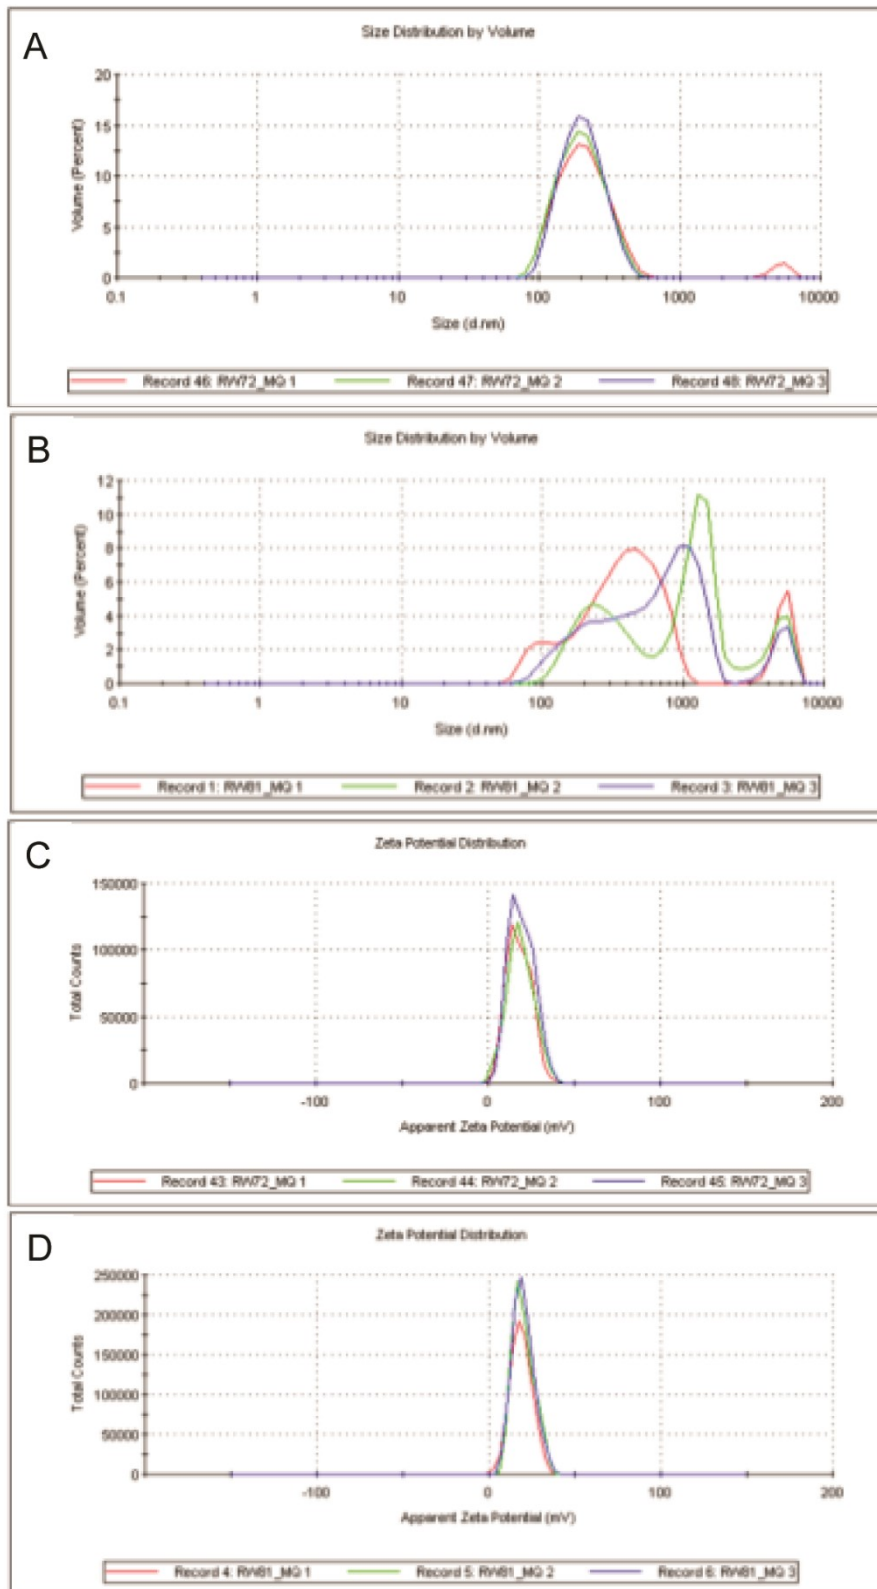

79

80 *Supplemental Figure 4. PLGA nanoparticle size and surface net charge after*  
 81 *functionalization with acylated peptides. Size distribution and zeta-potential of*



82 PLGA nanoparticles functionalized with (A and C) C16-hLF, and (B and D) 2xC20-  
83 hLF.

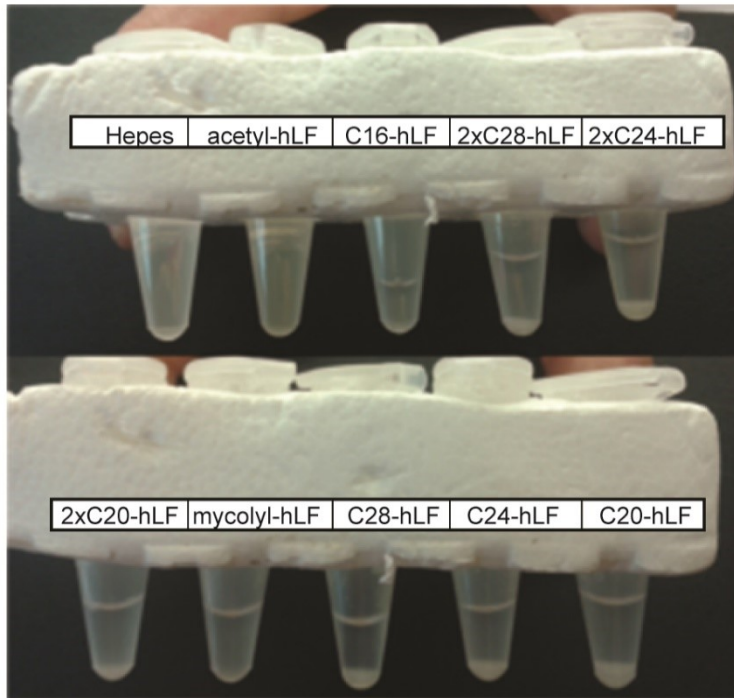

84

85 *Supplemental Figure 5. Aggregation of defrosted acyl-hLF peptides.*

86

**FA-PLGA, rhodamine-dextran**

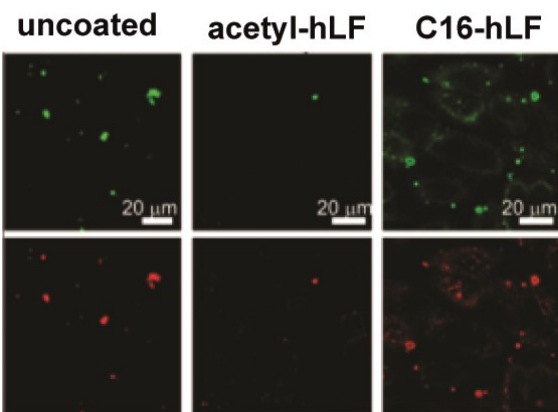

**FA-PLGA, rhodamine-dextran, 6-coumarin**

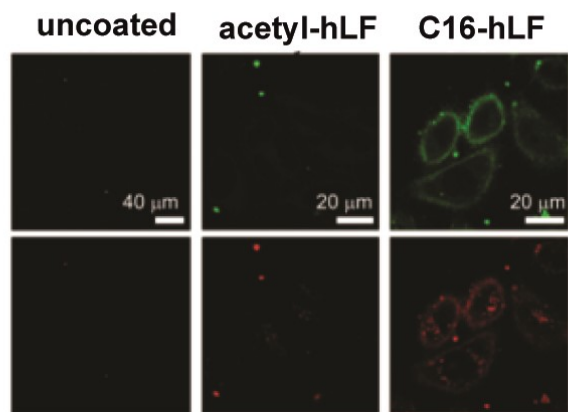

**6-coumarin**

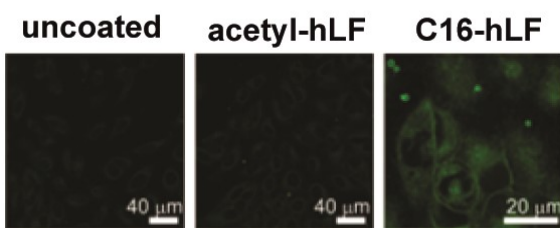

**FA-PLGA, 6-coumarin**

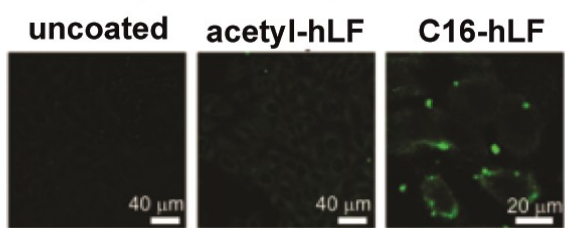

**Fluorescein**

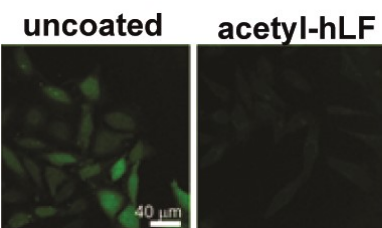

87

88 *Supplemental Figure 6. Comparison of different fluorescent compounds for*  
89 **particle labelling.** HeLa cells were incubated for 2 h with 0.4 mg/mL particles. After a  
90 comparison of the different combinations of fluorophores, we selected rhodamine-  
91 dextran, as the ideal fluorophore to be encapsulated into PLGA particles without  
92 significant leakage. Green: FA-PLGA, 6-coumarin, and fluorescein; Red: rhodamine-  
93 dextran

94

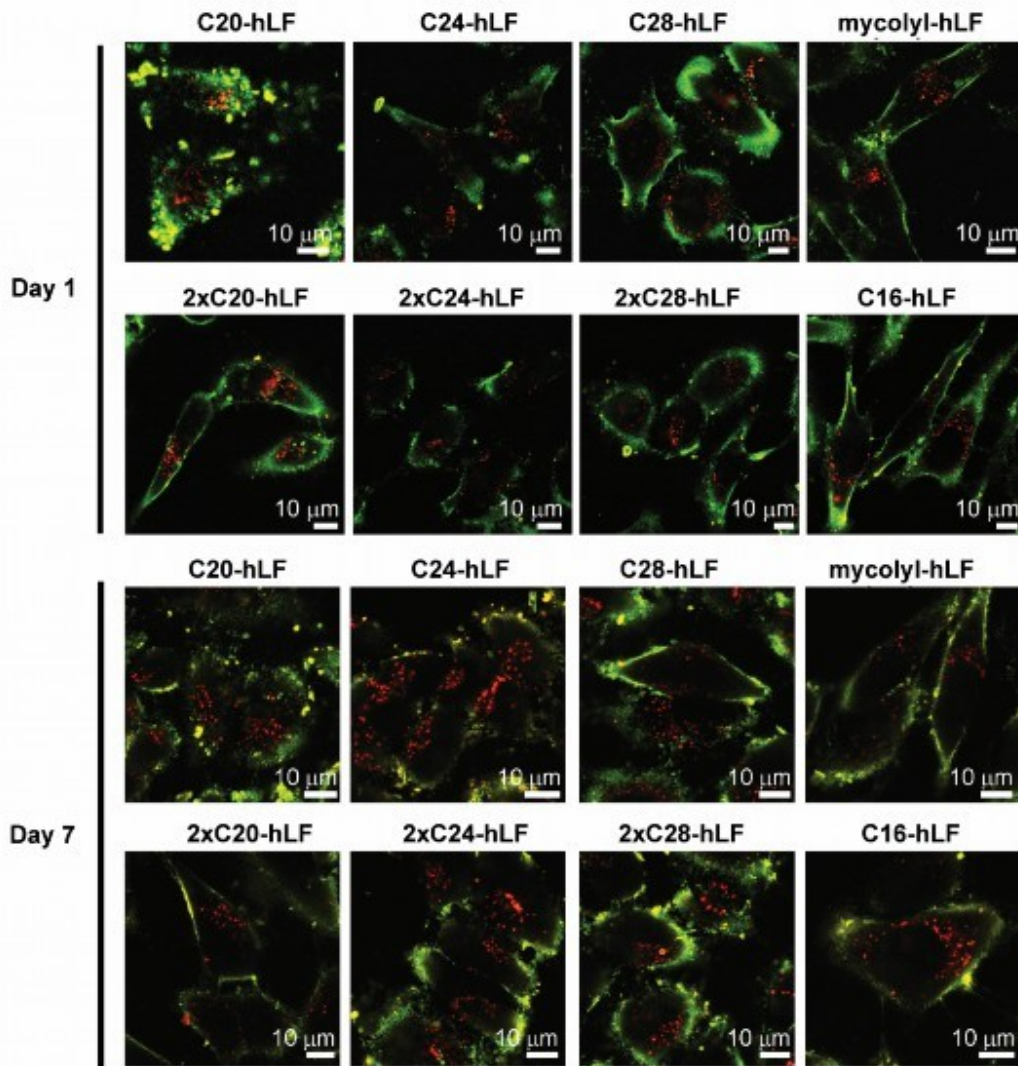

95

96 *Supplemental Figure 7. Uptake of FA-PLGA rhodamine-dextran particles into*  
 97 **HeLa cells.** Particles were coated with the indicated peptides followed by incubation  
 98 for the indicated number of days and incubated for 2 h with HeLa cells. Green: FA-  
 99 PLGA; Red: Rhodamine-dextran.

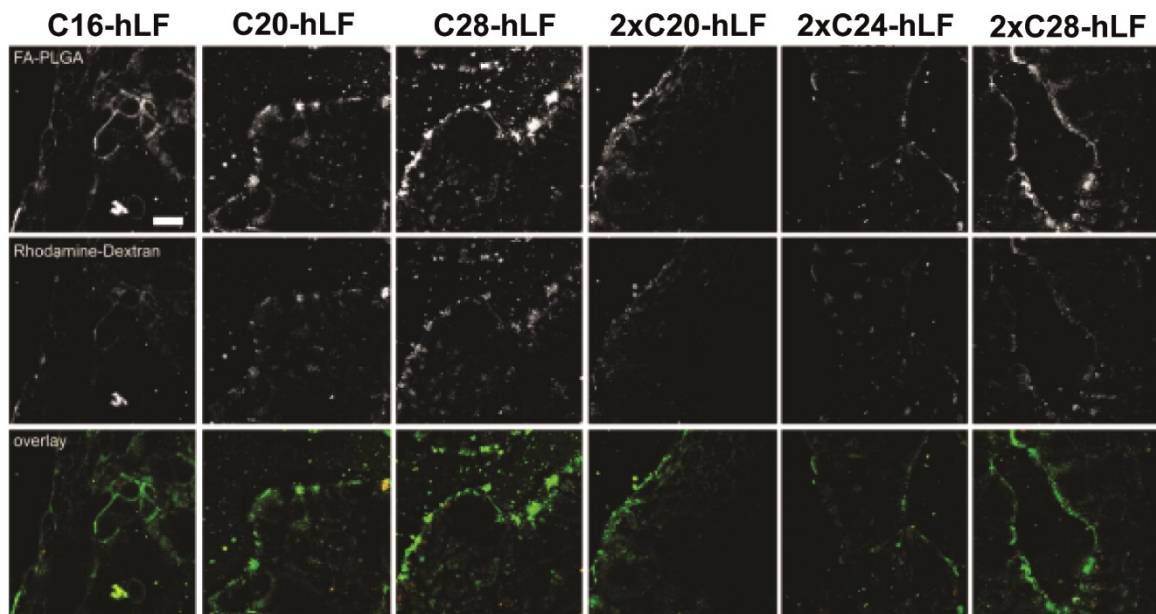

100

101 *Supplemental Figure 8. Uptake of FA-PLGA rhodamine-dextran particles in Caco-2*  
102 **cells.** Particles were coated with the indicated peptides and incubated for 2 h with  
103 Caco-2 cells. Scale bar denotes 40  $\mu$ m.

104

**XY-scan**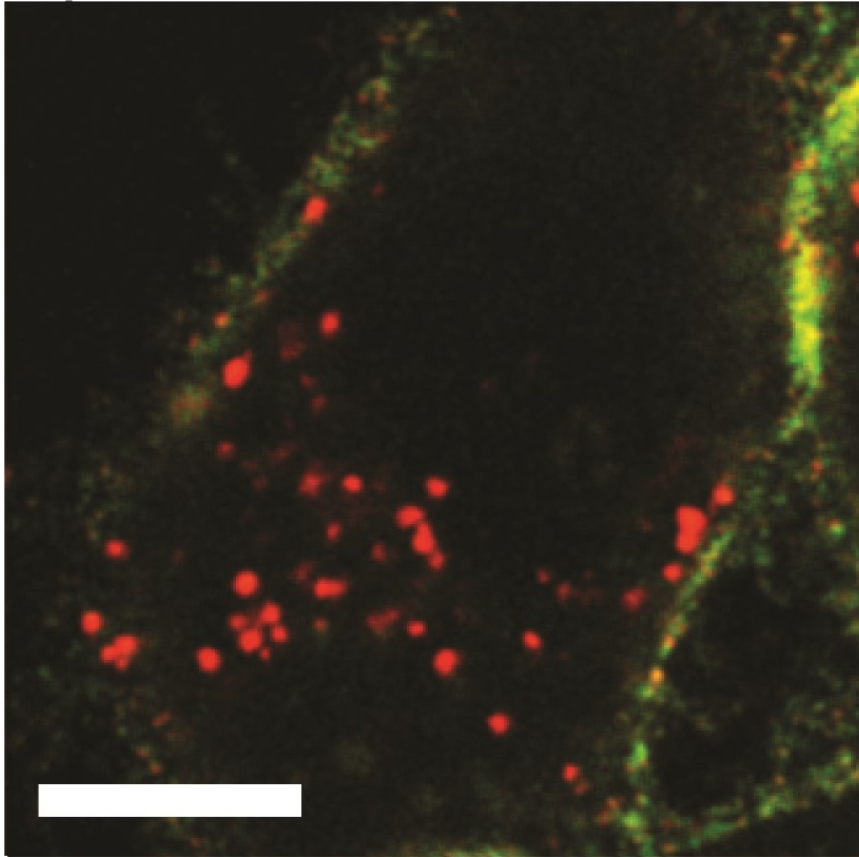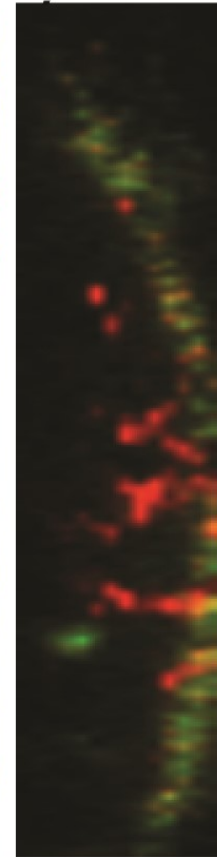**YZ cross-section**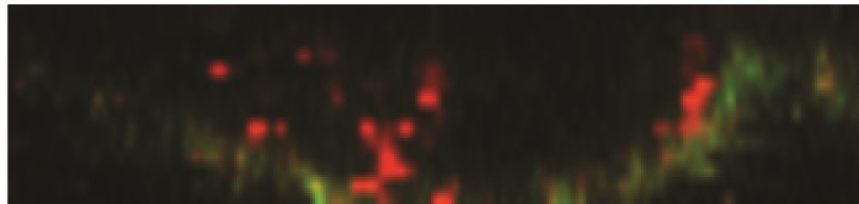**XZ cross-section**

106

107 *Supplemental Figure 9. Intracellular distribution of rhodamine-dextran.* HeLa cells

108 incubated with 0.4 mg/mL FA-PLGA PLGA rhodamine-dextran particles coated with

109 C16-hLF peptide for 2 hours.

110

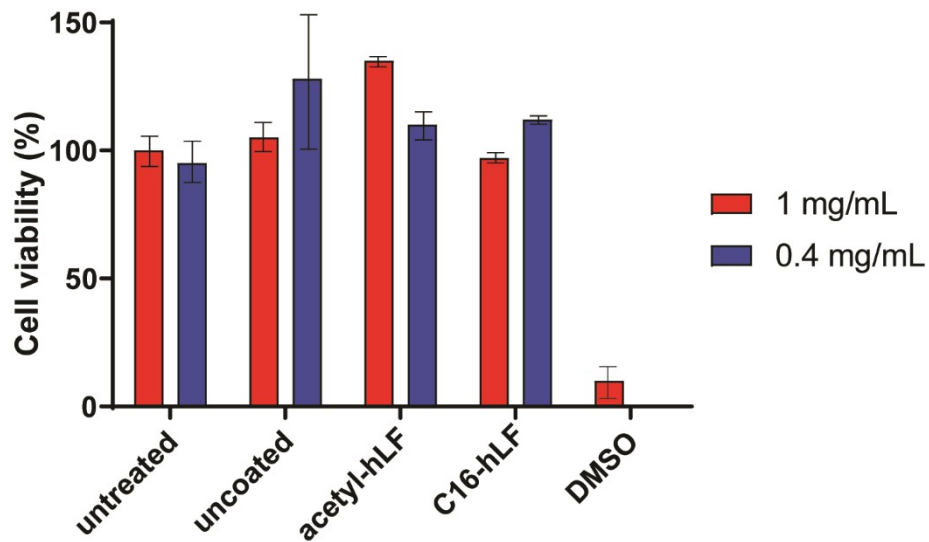

111

112 *Supplemental Figure 10. Toxicity of PLGA particles coated with acylated hLF*  
113 **peptides.** HeLa cells were incubated for 24h in RPMI + 10% FCS. Then, the Resazurin  
114 assay was performed to determine cell viability. Bars represent one single experiment.  
115 Standard deviations were calculated from two replicates in one experiment.

116



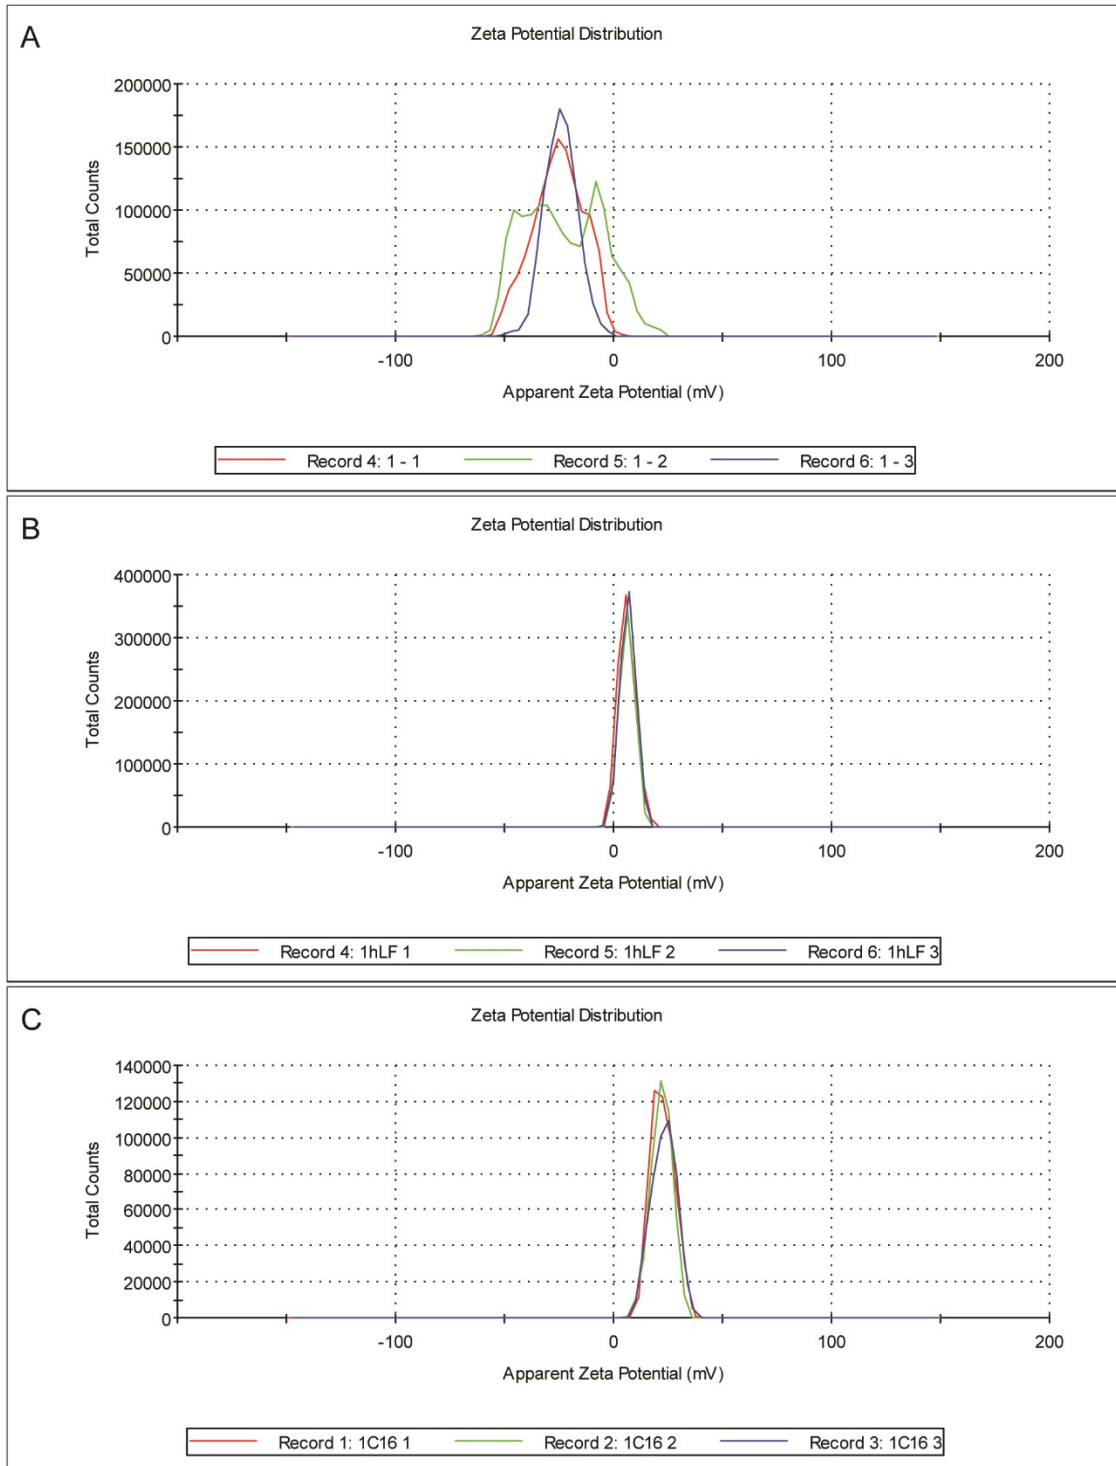

117

118 *Supplemental Figure 11. Surface net charge of PEG-PLGA nanoparticles.* Zeta-  
 119 potential measurement of uncoated (A) PEG-PLGA, and PEG-PLGA functionalized  
 120 with (B) acetyl-hIF or (C) C16-hLF.

121



**PEG-PLGA + Bodipy**

**Empty**

**Uncoated**

**acetyl-hLF**

**C16-hLF**

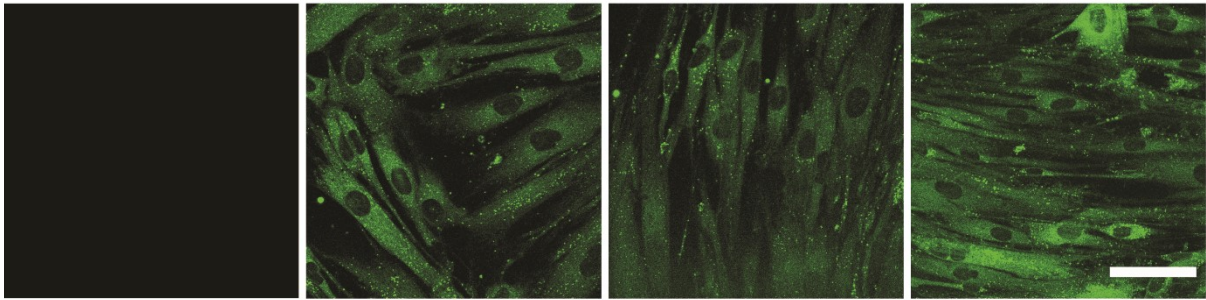

122

123 *Supplemental Figure 12. Periodontal ligament cells incubated with Bodipy-loaded*  
124 **PEG-PLGA particles.** C16-hLF coated particles outperformed acetyl-hLF and  
125 uncoated PEG-PLGA nanoparticles. Scale bar represents 50  $\mu$ m. Green: BODIPY.
